# Supplementary material for: Strong Hydrogen Bonds in Acetylenedicarboxylic Acid Dihydrate
Source: MDPI journal article supplement (doi:10.3390/ijms23116164), 2022-05-31
Supplement: s1 [file s1]

# Supplementary

Urban Novak, Amalija Golobič, Natalija Klančnik, Vlasta Mobaček-Grošev, Jernej Stare and Jožef Grdadolnik

**Table S1.** Crystal data, data collection and refinement of  $\alpha$ ,  $\beta 1$ ,  $\beta 2$  at 293,  $\alpha D$ ,  $\beta 1D$  and  $\beta 2D$ .

| Crystal structure           | $\alpha$                   | $\beta 1$                  | $\beta 2$                  | $\alpha D$                 | $\beta 1D$                 | $\beta 2D$                 |
|-----------------------------|----------------------------|----------------------------|----------------------------|----------------------------|----------------------------|----------------------------|
| Formula of compound         | $C_4H_2O_4 \cdot 2H_2O$    | $C_4H_2O_4 \cdot 2H_2O$    | $C_4H_2O_4 \cdot 2H_2O$    | $C_4D_2O_4 \cdot 2D_2O$    | $C_4D_2O_4 \cdot 2D_2O$    | $C_4D_2O_4 \cdot 2D_2O$    |
| $M_r$                       | 150.08                     | 150.08                     | 150.08                     | 156.12                     | 156.12                     | 156.12                     |
| Crystal system              | monoclinic                 | monoclinic                 | monoclinic                 | monoclinic                 | monoclinic                 | monoclinic                 |
| Space group                 | P2 <sub>1</sub> /c, No. 14 |
| $a$ [Å]                     | 7.9831(7)                  | 7.0611(6)                  | 6.9954(4)                  | 7.9965(6)                  | 7.0918(6)                  | 7.0143(5)                  |
| $b$ [Å]                     | 3.8666(4)                  | 5.4510(4)                  | 5.4828(4)                  | 3.8710(3)                  | 5.4471(5)                  | 5.4727(4)                  |
| $c$ [Å]                     | 11.0665(12)                | 9.8228(13)                 | 9.7714(9)                  | 11.0626(8)                 | 9.8523(14)                 | 9.7669(12)                 |
| $\beta$ [°]                 | 97.909(9)                  | 115.867(8)                 | 117.155(6)                 | 98.042(7)                  | 115.886(9)                 | 117.175(8)                 |
| $V$ [Å <sup>3</sup> ]       | 338.35(6)                  | 340.20(6)                  | 333.47(4)                  | 339.07(4)                  | 342.40(6)                  | 333.54(5)                  |
| No. of formula units, $Z$   | 2                          | 2                          | 2                          | 2                          | 2                          | 2                          |
| $D_x$ [Mg m <sup>-3</sup> ] | 1.473                      | 1.465                      | 1.495                      | 1.529                      | 1.514                      | 1.555                      |
| $F_{000}$                   | 156                        | 156                        | 156                        | 156                        | 156                        | 156                        |
| X-Ray radiation             | Cu K $\alpha$              | Cu K $\alpha$              | Mo K $\alpha$              | Mo K $\alpha$              | Mo K $\alpha$              | Mo K $\alpha$              |
| Wavelength, $\lambda$ [Å]   | 1.54184                    | 1.54184                    | 0.71073                    | 0.71073                    | 0.71073                    | 0.71073                    |
| $\mu$ [mm <sup>-1</sup> ]   | 1.293                      | 1.286                      | 0.147                      | 0.144                      | 0.143                      | 0.147                      |
| $T$ [K]                     | 293(2)                     | 263(2)                     | 150(2)                     | 293(2)                     | 263(2)                     | 150(2)                     |
| Colour                      | colourless                 | colourless                 | colourless                 | colourless                 | colourless                 | colourless                 |
| Dimensions of crystal [mm]  | 0.32x0.29x0.09             | 0.35x0.30x0.25             | 0.31x0.27x0.08             | 0.34x0.30x0.15             | 0.42x0.30x0.25             | 0.42x0.30x0.25             |
| No. of measured reflections | 1314                       | 1367                       | 1775                       | 1805                       | 3065                       | 3045                       |

|                                              |        |        |        |        |        |        |
|----------------------------------------------|--------|--------|--------|--------|--------|--------|
| No. of unique reflections                    | 688    | 690    | 880    | 894    | 925    | 905    |
| $R_{\text{int}}$ , [%]                       | 0.0173 | 0.0116 | 0.0241 | 0.0158 | 0.0349 | 0.0624 |
| No of ( $F^2 > 2.0\sigma(F^2)$ ) reflections | 571    | 635    | 677    | 621    | 591    | 609    |
| $\Theta$ maximal [°]                         | 75.02  | 74.97  | 30.16  | 30.37  | 30.23  | 30.11  |
| $R[F^2 > 2\sigma(F^2)]$                      | 0.0550 | 0.0366 | 0.041  | 0.043  | 0.0486 | 0.0451 |
| $wR(F^2)$                                    | 0.1519 | 0.1044 | 0.1104 | 0.1045 | 0.1163 | 0.1155 |
| Goof, S                                      | 1.088  | 1.058  | 1.092  | 1.042  | 1.087  | 1.100  |
| No. of contributing reflections              | 688    | 690    | 880    | 894    | 925    | 905    |
| No. of parameters                            | 58     | 58     | 58     | 58     | 58     | 58     |
| $(\Delta/\sigma)$ maximal                    | 0.002  | 0.000  | 0.000  | 0.000  | 0.000  | 0.000  |
| $(\Delta\rho)$ —maximal [e Å <sup>-3</sup> ] | 0.198  | 0.218  | 0.252  | 0.206  | 0.185  | 0.232  |
| $(\Delta\rho)$ —minimal Å <sup>-3</sup> ]    | −0.225 | −0.150 | −0.230 | −0.143 | −0.224 | −0.253 |

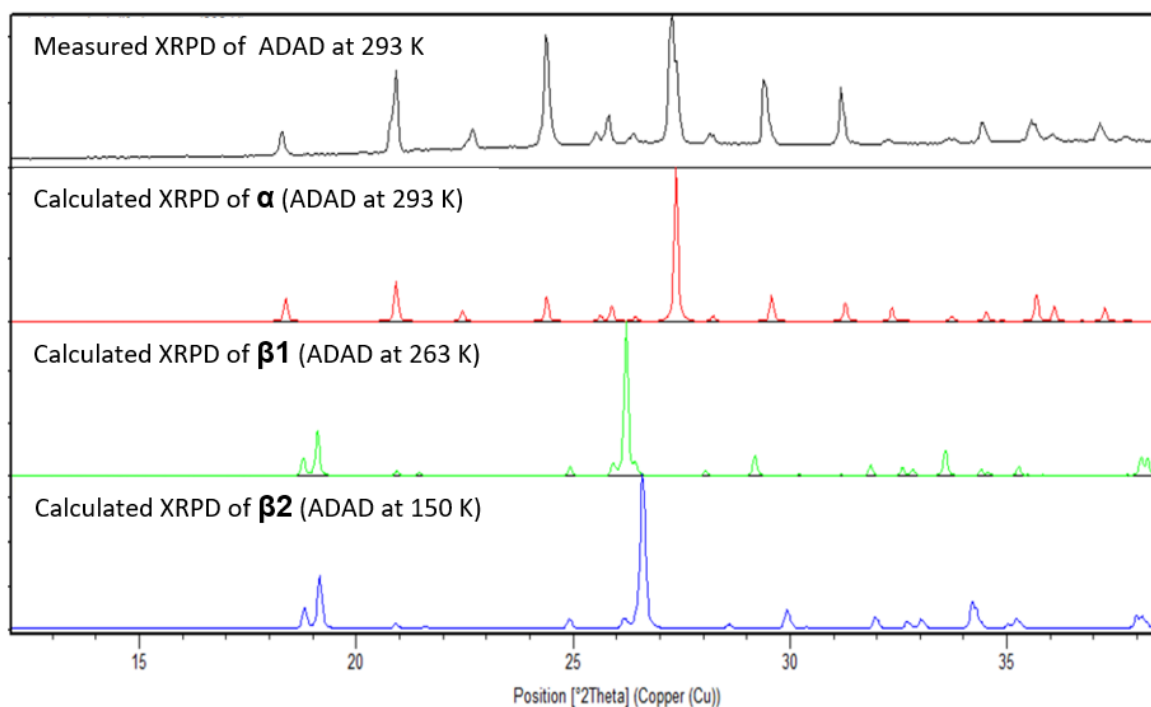

**Figure S1.** X-ray powder diffraction patterns (XRPD) of ADAD.

**Table S2.** Bond lengths and angles.

| Bond length (Å)        | <b>α</b>   | <b>β1</b>  | <b>β2</b>  | <b>αD</b>  | <b>β1D</b> | <b>β2D</b> |
|------------------------|------------|------------|------------|------------|------------|------------|
| C1—C1 <sup>i</sup>     | 1.181(4)   | 1.185(2)   | 1.189(3)   | 1.183(3)   | 1.189(3)   | 1.191(3)   |
| C1—C2                  | 1.465(2)   | 1.4615(16) | 1.465(2)   | 1.464(2)   | 1.461(2)   | 1.465(2)   |
| C2—O2                  | 1.204(2)   | 1.2091(16) | 1.2143(18) | 1.2046(19) | 1.209(2)   | 1.2104(19) |
| C2—O1                  | 1.285(3)   | 1.2892(17) | 1.2991(19) | 1.287(2)   | 1.294(2)   | 1.295(2)   |
| O1—H1                  | 0.95(4)    | 0.92(2)    | 0.91(3)    | 0.93(3)    | 0.94(3)    | 0.89(2)    |
| O3—H2                  | 0.77(5)    | 0.93(3)    | 0.81(3)    | 0.80(3)    | 0.81(3)    | 0.79(2)    |
| O3—H3                  | 0.99(3)    | 0.88(2)    | 0.97(2)    | 0.88(3)    | 0.89(3)    | 0.99(2)    |
| Bonding angle (°)      | <b>α</b>   | <b>β1</b>  | <b>β2</b>  | <b>αD</b>  | <b>β1D</b> | <b>β2D</b> |
| C1 <sup>i</sup> —C1—C2 | 176.2(3)   | 176.85(19) | 176.7(2)   | 176.1(2)   | 176.7(3)   | 176.6(2)   |
| O2—C2—O1               | 125.26(16) | 125.66(11) | 125.78(13) | 125.45(14) | 125.47(15) | 125.73(15) |
| O2—C2—C1               | 120.42(17) | 121.05(11) | 120.87(13) | 120.55(15) | 121.32(16) | 121.03(14) |
| O1—C2—C1               | 114.32(16) | 113.29(11) | 113.35(13) | 114.00(15) | 113.20(16) | 113.24(15) |
| C2—O1—H1               | 110(2)     | 107.2(15)  | 112.2(17)  | 108.8(15)  | 110.9(15)  | 110.6(15)  |
| H2—O3—H3               | 105(3)     | 109(2)     | 107(2)     | 112(3)     | 114(2)     | 107.1(18)  |

(i)  $-x, -y, -z+2$

**Table S3.** Geometric parameters of hydrogen bonds in protic (upper table) and deuterated (lower table) ADAD .

| <b>α</b>                 | X—H (Å) | H...Y (Å) | X...Y (Å)  | X—H...Y (°) |
|--------------------------|---------|-----------|------------|-------------|
| O1—H1...O3               | 0.95(3) | 1.60(3)   | 2.542(2)   | 172(3)      |
| O3—H2...O2 <sup>i</sup>  | 0.77(5) | 2.27(5)   | 2.904(2)   | 141(4)      |
| O3—H2...O3 <sup>i</sup>  | 0.77(5) | 2.59(4)   | 3.098(3)   | 125(3)      |
| O3—H3...O2 <sup>ii</sup> | 1.00(3) | 1.81(3)   | 2.774(2)   | 163(3)      |
| <b>β1</b>                |         |           |            |             |
| O1—H1...O3               | 0.91(2) | 1.63(3)   | 2.5394(18) | 174(3)      |
| O3—H2...O2 <sup>i</sup>  | 0.93(3) | 2.01(3)   | 2.8671(18) | 152(3)      |

|                             |         |          |            |        |
|-----------------------------|---------|----------|------------|--------|
| O3—H2...O3 <sup>i</sup>     | 0.93(3) | 2.57(3)  | 3.1329(16) | 120(2) |
| O3—H3...O2 <sup>ii</sup>    | 0.88(2) | 1.92(2)  | 2.7724(16) | 164(2) |
| <b><math>\beta_2</math></b> |         |          |            |        |
| O1—H1...O3                  | 0.92(3) | 1.62(3)  | 2.5328(19) | 176(2) |
| O3—H2...O2 <sup>i</sup>     | 0.81(3) | 2.10(3)  | 2.8513(18) | 154(3) |
| O3—H2...O3 <sup>i</sup>     | 0.81(3) | 2.614(3) | 3.1100(16) | 121(2) |
| O3—H3...O2 <sup>ii</sup>    | 0.97(2) | 1.80(2)  | 2.7654(16) | 172(2) |

|                                |         |           |           |             |
|--------------------------------|---------|-----------|-----------|-------------|
| <b><math>\alpha D</math></b>   | X—D (Å) | D...Y (Å) | X...Y (Å) | X—D...Y (°) |
| O1—D1...O3                     | 0.93(2) | 1.62(2)   | 2.552(2)  | 174(2)      |
| O3—D2...O2 <sup>i</sup>        | 0.80(3) | 2.20(3)   | 2.909(2)  | 149(2)      |
| O3—D2...O3 <sup>i</sup>        | 0.80(3) | 2.55(3)   | 3.088(3)  | 126(3)      |
| O3—D3...O2 <sup>ii</sup>       | 0.87(3) | 1.91(3)   | 2.782(2)  | 175(3)      |
| <b><math>\beta_{1D}</math></b> |         |           |           |             |
| O1—D1...O3                     | 0.94(3) | 1.61(3)   | 2.553(2)  | 179(4)      |
| O3—D2...O2 <sup>i</sup>        | 0.81(3) | 2.16(3)   | 2.882(2)  | 149(3)      |
| O3—D2...O3 <sup>i</sup>        | 0.81(3) | 2.59(3)   | 3.137(2)  | 126(3)      |
| O3—D3...O2 <sup>ii</sup>       | 0.89(3) | 1.91(3)   | 2.782(2)  | 167(3)      |
| <b><math>\beta_{2D}</math></b> |         |           |           |             |
| O1—D1...O3                     | 0.89(3) | 1.65(3)   | 2.542(2)  | 178(3)      |
| O3—D2...O2 <sup>i</sup>        | 0.79(2) | 2.13(2)   | 2.860(2)  | 153(2)      |
| O3—D2...O3 <sup>i</sup>        | 0.79(2) | 2.617(3)  | 3.103(2)  | 121(2)      |
| O3—D3...O2 <sup>ii</sup>       | 0.99(2) | 1.80(2)   | 2.770(2)  | 169(2)      |

(i)  $1-x, 1/2+y, 3/2-z$ ; (ii)  $x, -1/2-y, -1/2+z$ ;

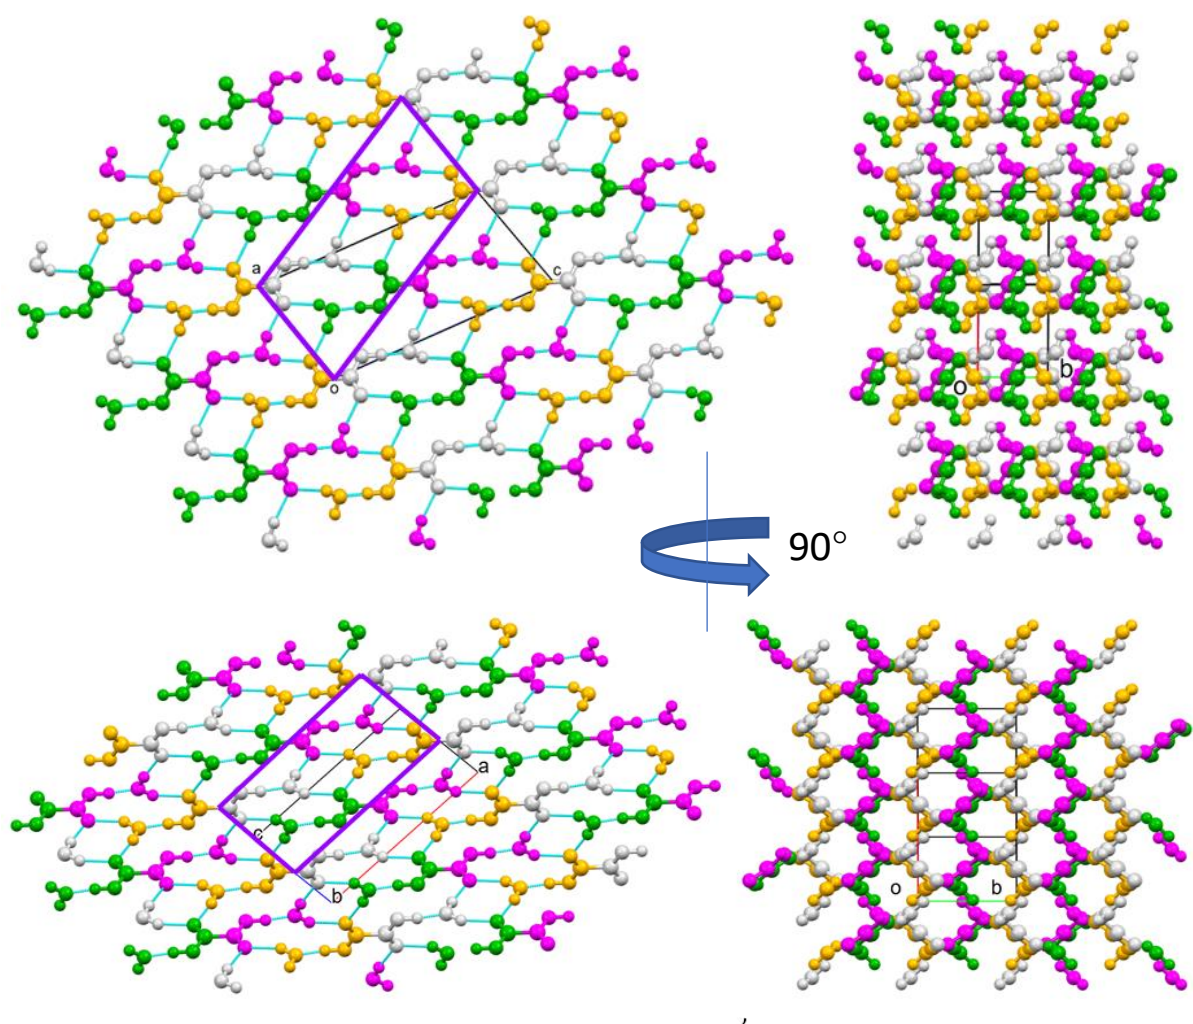

**Figure S2.** Presentation of crystal packing of molecules in OADH using colouring for symmetry operations: asymmetric unit is drawn in light grey, inversion symmetry in yellow, 2-fold screw axis.

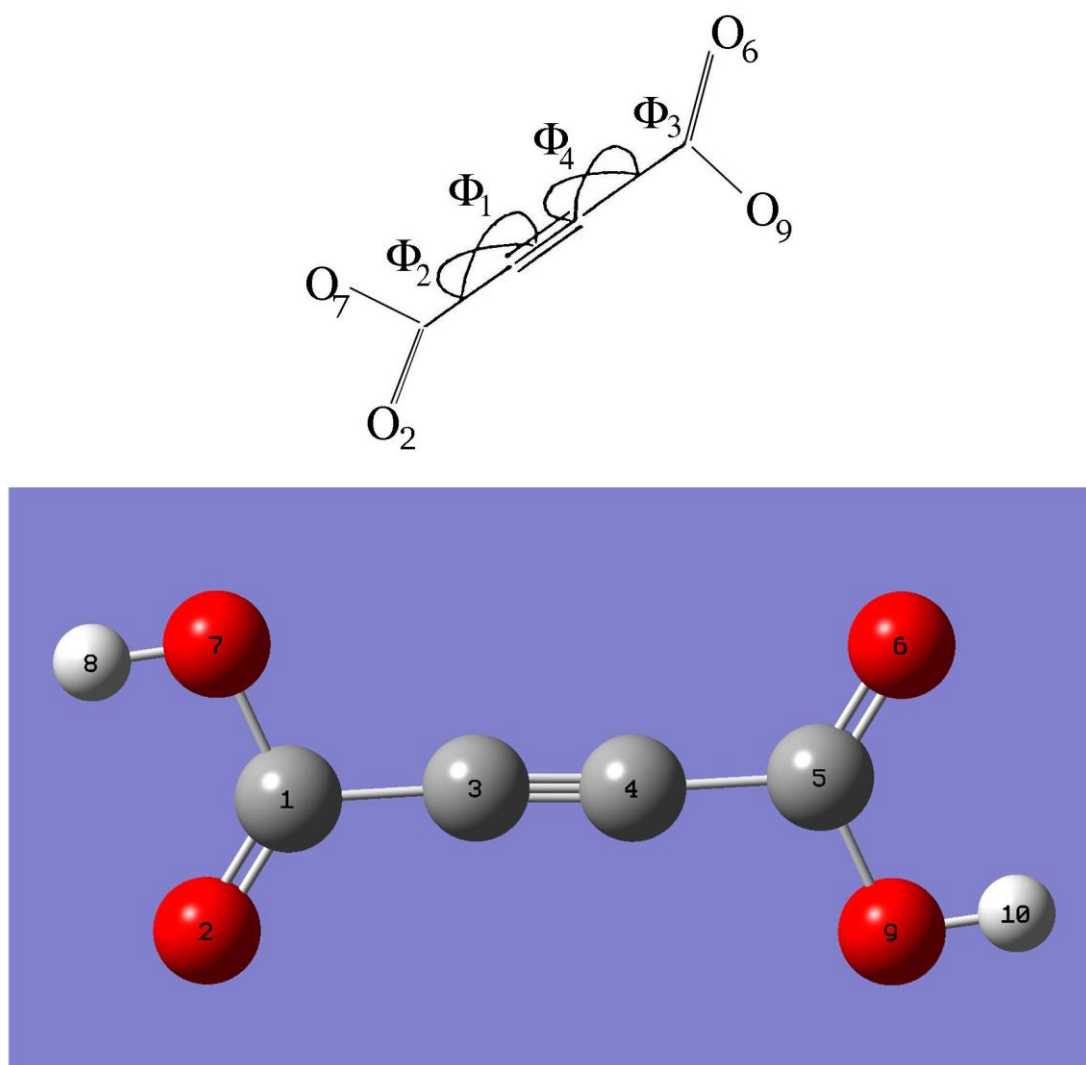

**Figure S3.** The definition and assignment of torsion angles and atom numbers used in QM calculations.

**Table S4.** Definition of internal coordinates in *trans* acetylenedicarboxylic acid. Atom numbering is shown in Supplementary Figure S3.

Deformations of bond stretching coordinates

1.  $\Delta T = \Delta(C_3 \equiv C_4)$
2.  $\Delta D_1 = \Delta(C_1=O_2)$
3.  $\Delta D_2 = \Delta(C_5=O_6)$
4.  $\Delta R_1 = \Delta(C_1 - C_3)$
5.  $\Delta R_2 = \Delta(C_4 - C_5)$
6.  $\Delta S_1 = \Delta(C_1 - O_7)$
7.  $\Delta S_2 = \Delta(C_5 - O_9)$
8.  $\Delta l_1 = \Delta(O_7 - H_8)$
9.  $\Delta l_2 = \Delta(O_9 - H_{10})$
10.  $\Delta \epsilon_1 = \Delta(C_1 - O_7 - H_8)$
11.  $\Delta \epsilon_2 = \Delta(C_5 - O_9 - H_{10})$
12.  $\Delta \eta_1 = \Delta(O_2 - C_1 - O_7)$
13.  $\Delta \eta_2 = \Delta(O_6 - C_5 - O_9)$
14.  $\Delta \kappa_1 = \Delta(O_2 - C_3 - C_1)$
15.  $\Delta \kappa_2 = \Delta(O_6 - C_5 - C_4)$
16.  $\Delta \lambda_1 = \Delta(\text{out of plane } C_1 - O_7 \text{ bending})$
17.  $\Delta \lambda_2 = \Delta(\text{out of plane } C_5 - O_9 \text{ bending})$
18.  $\Delta \Phi_1 = \Delta(\text{linear bending } O_2 - C_1 - C_3 - C_4 \text{ in the molecular plane})$
19.  $\Delta \Phi_2 = \Delta(\text{linear bending } O_2 - C_1 - C_3 - C_4 \text{ perpendicular to the molecular plane})$
20.  $\Delta \Phi_3 = \Delta(\text{linear bending } O_6 - C_5 - C_4 - C_3 \text{ in the molecular plane})$
21.  $\Delta \Phi_4 = \Delta(\text{linear bending } O_6 - C_5 - C_4 - C_3 \text{ perpendicular to the molecular plane})$
22.  $\Delta \tau_{OH_1} = \Delta(\text{torsion } H_8 - O_7 - C_1 - C_3)$
23.  $\Delta \tau_{OH_2} = \Delta(\text{torsion } H_{10} - O_9 - C_5 - C_4)$
24.  $\Delta \tau_{COOH} = \Delta(\text{torsion } O_6 - C_5 - C_4 - O_7 + \text{torsion } O_2 - C_1 - C_3 - O_9)$

**Table S5.** Definition of symmetrized coordinates for *trans* acetylenedicarboxylic acid with  $C_{2h}$  symmetry.

**9  $A_g$**

1.  $S_1 = \Delta T$
2.  $S_2 = \Delta D_1 + \Delta D_2$
3.  $S_3 = \Delta R_1 + \Delta R_2$
4.  $S_4 = \Delta S_1 + \Delta S_2$
5.  $S_5 = \Delta l_1 + \Delta l_2$
6.  $S_6 = \Delta \varepsilon_1 + \Delta \varepsilon_2$
7.  $S_7 = \Delta \eta_1 + \Delta \eta_2$
8.  $S_8 = \Delta \kappa_1 + \Delta \kappa_2$
9.  $S_9 = \Delta \Phi_1 + \Delta \Phi_3$

**3  $B_g$**

10.  $S_{10} = \Delta \lambda_1 - \Delta \lambda_2$
11.  $S_{11} = \Delta \Phi_2 + \Delta \Phi_4$
12.  $S_{12} = \Delta \tau OH_1 - \Delta \tau OH_2$

**4  $A_u$**

13.  $S_{13} = \Delta \lambda_1 + \Delta \lambda_2$
14.  $S_{14} = \Delta \tau OH_1 + \Delta \tau OH_2$
15.  $S_{15} = \Delta \Phi_2 - \Delta \Phi_4$
16.  $S_{16} = \Delta \tau COOH$

**8  $B_u$**

17.  $S_{17} = \Delta D_1 - \Delta D_2$
18.  $S_{18} = \Delta R_1 - \Delta R_2$
19.  $S_{19} = \Delta S_1 - \Delta S_2$
20.  $S_{20} = \Delta l_1 - \Delta l_2$
21.  $S_{21} = \Delta \varepsilon_1 - \Delta \varepsilon_2$
22.  $S_{22} = \Delta \eta_1 - \Delta \eta_2$
23.  $S_{23} = \Delta \kappa_1 - \Delta \kappa_2$
24.  $S_{24} = \Delta \Phi_1 - \Delta \Phi_3$



**Table S6.** Unscaled normal modes of *trans* acetylenedicarboxylic acid with  $C_{2h}$  symmetry with potential energy distribution (PED) among symmetrized coordinates calculated by BALGA<sup>†</sup> program are compared with the observed bands of crystal. Contributions greater than 10% are given. Torsional frequency of carboxyl groups is calculated as imaginary.

| symmetry<br>$C_{2h}$ | observed<br>Raman<br>crystal<br>293 K                                                      | observed<br>infrared<br>crystal 295<br>K                     | calculated                                                       | PED (%)                                                                                                                                                                                                                                                                                                                                                                        | approximate description                                                                                                                                                                                |
|----------------------|--------------------------------------------------------------------------------------------|--------------------------------------------------------------|------------------------------------------------------------------|--------------------------------------------------------------------------------------------------------------------------------------------------------------------------------------------------------------------------------------------------------------------------------------------------------------------------------------------------------------------------------|--------------------------------------------------------------------------------------------------------------------------------------------------------------------------------------------------------|
| <b>A<sub>g</sub></b> | 3402<br>2246<br>2004 br<br>1688,1649<br>1454,1445<br>1332,1288<br>758<br>609<br>415<br>212 | inactive                                                     | 2365<br>3761<br>1816<br>1374<br>1188<br>734<br>615<br>358<br>204 | 100 S <sub>5</sub><br>84 S <sub>1</sub> + 16 S <sub>3</sub><br>89 S <sub>2</sub><br>45 S <sub>6</sub> + 28 S <sub>4</sub> + 19 S <sub>7</sub><br>46 S <sub>4</sub> + 41 S <sub>6</sub><br>33 S <sub>7</sub> + 22 S <sub>3</sub> + 22 S <sub>4</sub><br>56 S <sub>8</sub> + 35 S <sub>9</sub><br>49 S <sub>3</sub> + 44 S <sub>7</sub><br>63 S <sub>9</sub> + 36 S <sub>8</sub> | water sym. OH str.<br>C≡C stretch.<br>sym. O-H stretching<br>C=O sym. str.<br>COH bend.+C-O str.<br>C-O str. + COH bend<br>O=C-O scissor<br>O=C-C bend.<br>C-C str.+O=C-C sciss.<br>in pl. CC≡CC bend. |
| <b>B<sub>g</sub></b> | 3470 sh<br>808, 794<br>637<br>315,285                                                      | inactive                                                     | 767<br>627<br>327                                                | 88 S <sub>10</sub><br>93 S <sub>12</sub><br>80 S <sub>11</sub>                                                                                                                                                                                                                                                                                                                 | water OH str<br>out of plane C-O bend<br>OH torsion<br>out of pl.CC≡CC bend                                                                                                                            |
| <b>A<sub>u</sub></b> | inactive                                                                                   | 3508<br><br>758<br>1071                                      | 767<br>614<br>120<br>35i                                         | 91 S <sub>13</sub><br>97 S <sub>14</sub><br>97 S <sub>15</sub><br>100 S <sub>16</sub>                                                                                                                                                                                                                                                                                          | water asym. OH str.<br><br>out of plane C-O bend<br>OH torsion<br>o.of pl. CC≡CC bend<br>COOH torsion                                                                                                  |
| <b>B<sub>u</sub></b> | inactive                                                                                   | 3382<br><br>1968 br<br>1647,1602<br>1435<br>1257,1271<br>994 | 3761<br><br>1823<br>1401<br>1196<br>986<br>599<br>542<br>81      | 100 S <sub>20</sub><br><br>87 S <sub>17</sub><br>35 S <sub>21</sub> + 24 S <sub>19</sub> + 23 S <sub>18</sub><br>52 S <sub>21</sub> + 28 S <sub>19</sub> + 15 S <sub>18</sub><br>55 S <sub>18</sub> + 38 S <sub>19</sub><br>47 S <sub>22</sub> + 35 S <sub>23</sub><br>46 S <sub>23</sub> + 40 S <sub>22</sub><br>86 S <sub>24</sub>                                           | water sym. OH str.<br>antisym.O-H stretch.<br><br>antisym.C=O sym. str<br>COH bend.+C-O str.<br>COH bend.+C-O str<br>C-C str.+C-O str<br>O=C-O scissor<br>O=C-C bend<br>in pl. CC≡CC bend.             |

<sup>†</sup> G. Keresztury, G. Jalsovszky J. Mol. Struct. 10 (1971) 304.

H. Rostkowski, L. Lapinski, M. Nowak Vib. Spectrosc. 49 (2009) 43.

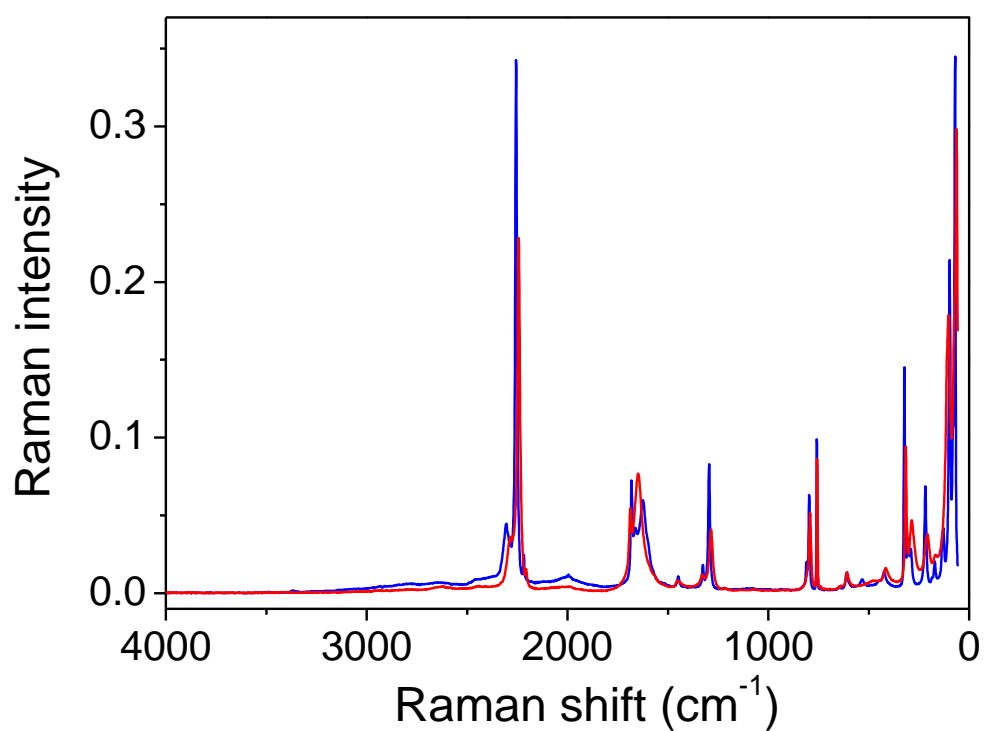

**Figure S4.** The FT-Raman spectrum of ADAD recorded at  $T=25^{\circ}\text{C}$  (red line) and  $T=-110^{\circ}\text{C}$  (blue line).

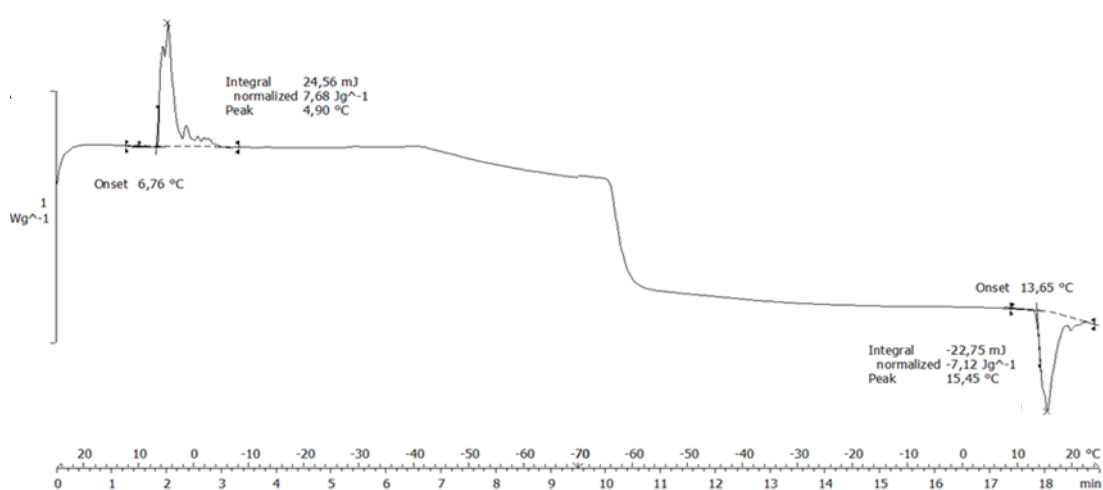

**Figure S5.** DSC curve of ADAD.

# Additional X-ray data

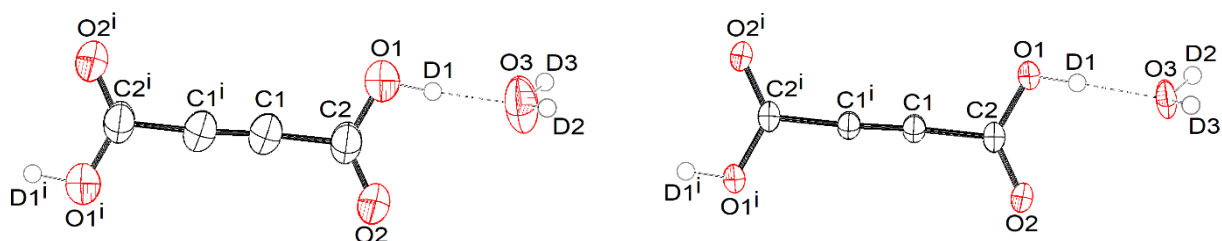

**Figure S6.** Ortep drawings with atom labelling scheme of water and acetylenecarboxylic acid molecules in  $\alpha$ D (left) and  $\beta$ 2D (right) structure. Displacement ellipsoids are at 50% probability level. (i:  $-x, -y, -z+2$ ).

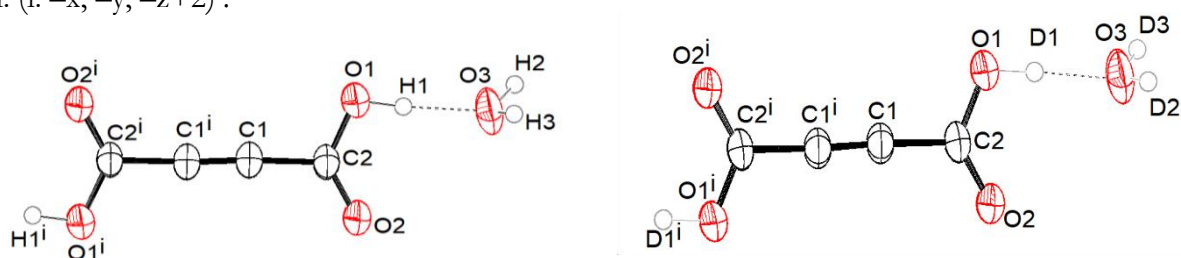

**Figure S7.** Ortep drawings with atom labelling scheme of water and acetylenecarboxylic acid molecules in  $\beta$ 1 (left) and  $\beta$ 1D (right) structure. Displacement ellipsoids are at 50% probability level. (i:  $-x, -y, -z+2$ ).

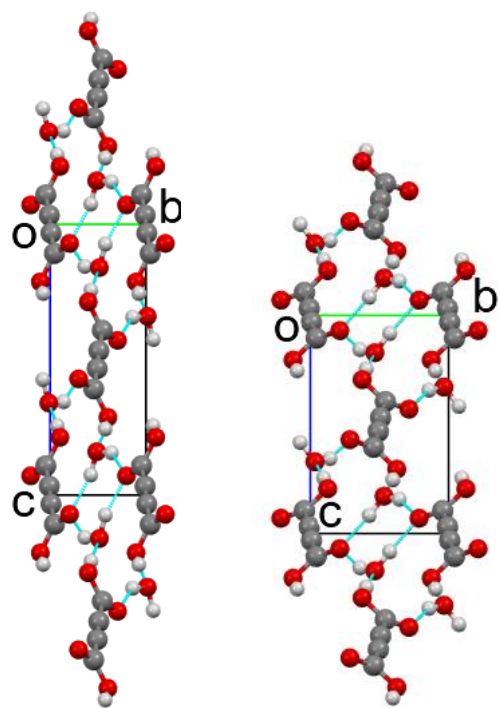

**Figure S8.** Drawings of molecular packing of  $\alpha$  (left) and  $\beta_2$  (right) structure viewed along  $a$  axis. Blue lines represent hydrogen bonds.

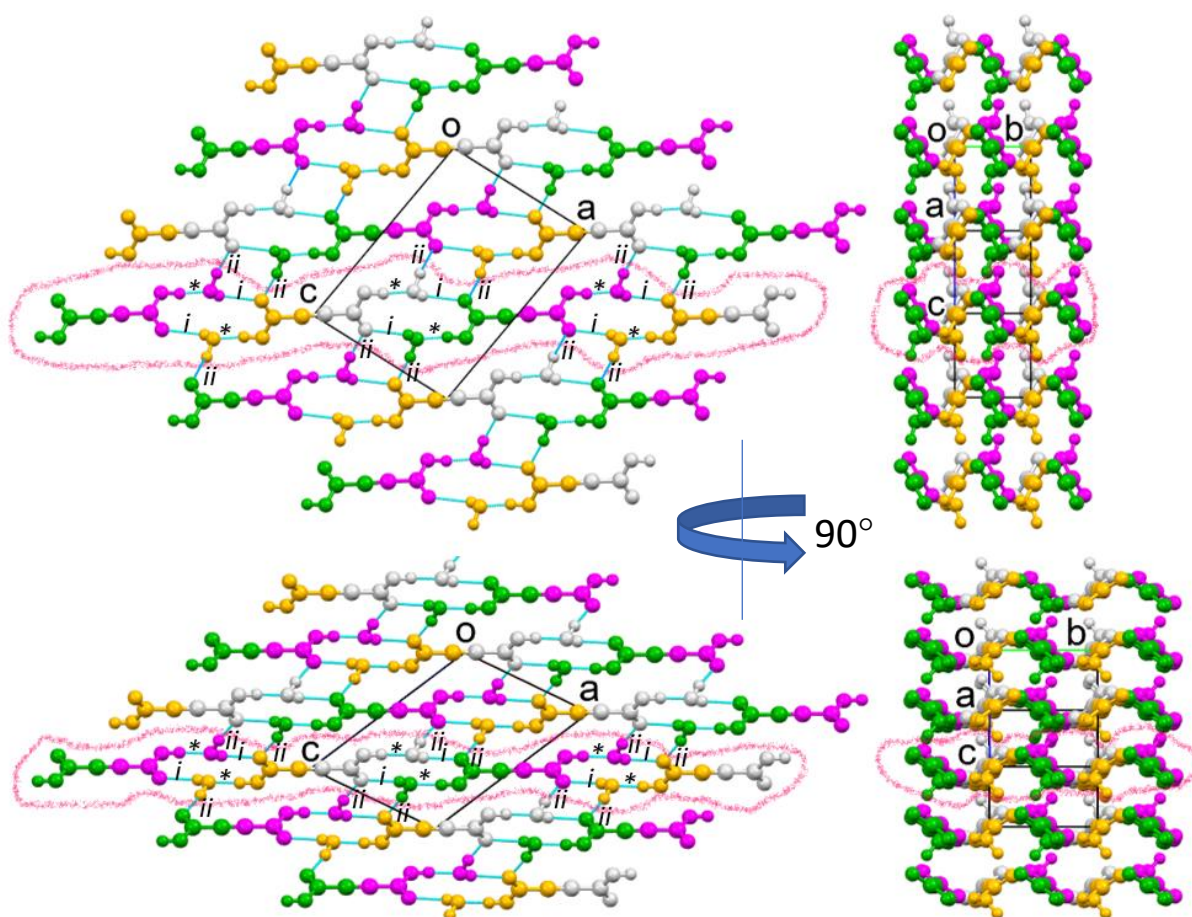

**Figure S9.** Presentation of crystal packing of molecules in ADAD using colouring for symmetry operations: asymmetric unit is drawn in light grey, inversion symmetry in yellow, 2-fold screw axis in green, and  $c$  glide plane in pink. Left drawings represent a view on structures of  $\alpha$  (top) and  $\beta_2$  (bottom) along  $b$  axis and right drawings a view on the structures rotated for  $90^\circ$  with  $b$  axis lying in plane of paper.

in green, and  $c$  glide plane in pink. Left drawings represent a view on structures of  $\alpha$  (top) OXACDH28 and  $\beta$  (bottom) OXACDH29 along  $b$  axis and right drawings a view on the structures rotated for  $90^\circ$  with  $b$  axis lying in plane of paper. The purple lines represent unit cells after cell transformation on the same coordinate system.

OXACDH28, OXACDH29: [6]

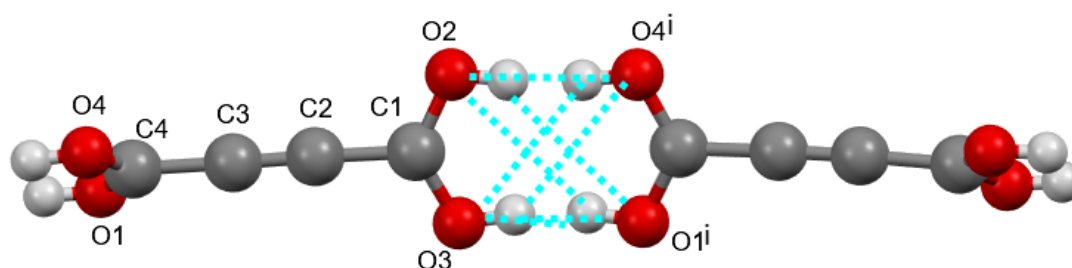

**Figure S10:** Presentation of molecules of acetylenedicarboxylic acid in anhydrous structure (ADCA) [32]. The lengths of bonds between carbon atoms in ADCA [(C2≡C3 1.188, C1–C2 1.454 and C3–C4 1.455 Å) are similar to that of ADAD. On the other hand, the bond lengths C1≈O2 1.262, C1≈O3 1.245, C4≈O1 1.259 and C4≈O4 1.246 Å and H atoms positions with 50% occupancy reflect that carboxyl groups in ADCA are disordered which is not the case in ADAD. The conformation of acid molecules in anhydrous structure also differs from that of hydrated. In ADAD molecules are centrosymmetric and nearly planar while in ADCA molecules are asymmetric and twisted with torsion angle O2–C1–C4–O4 of  $\approx 60^\circ$ . Hydrogen bonds between acid and water molecules in ADAD are significantly stronger than hydrogen bonds between acid molecules in ADCA (O3...O<sup>i</sup> 2.656 and O2...O4<sup>i</sup> 2.694 Å,  $i: -1/2+x, 1.5-y, 1/2+z$ ). The structure of ADCA was determined also at high pressures from 0.18 up to 5.2 GPa) [32]. At high pressure the structure of ADCA remains to be disordered, with twisted molecules and hydrogen bonds of moderate strength.
